# Supplementary material
Source: HighWire-hosted journal article supplement (http://dmd.aspetjournals.org/highwire/filestream/72604/field_highwire_adjunct_files/0/Supplemental_83733.pdf)
Supplement: Supplemental_83733.pdf [file Supplemental_83733.pdf]

**Extrapolation of In Vivo Hepatic Clearance from *In Vitro* Uptake Clearance by Suspended Human Hepatocytes (IVIVE) for Anionic Drugs with High Binding to Human Albumin: Improvement of IVIVE by Considering the “Albumin-Mediated” Hepatic Uptake Mechanism Based on the Facilitated-Dissociation Model**

Soo-Jin Kim\*, Kyeong-Ryoon Lee\*, Seiji Miyauchi, and Yuichi Sugiyama

Sugiyama Laboratory, RIKEN Baton Zone Program, RIKEN Cluster for Science, Technology and Innovation Hub, RIKEN, 1-7-22 Suehiro-cho, Tsurumi-ku, Yokohama 230-0045, Japan (S.K., K.L., Y.S.)

Life Science Institute, Daewoong Pharmaceutical, 56 Dugye-ro, Pogok-eup, Cheoin-gu, Yongin, 17028, Korea (K.L.)

Faculty of Pharmaceutical Sciences, Toho University, 2-2-1 Miyama, Funabashi, Chiba, Japan (S.M.)

\*Equal contribution

Journal: Drug metabolism and disposition

The material includes 2 supplementary Figures, and 3 supplemental Tables.

**Supplemental Figure 1.** Time profiles of the uptake of OATP substrates in suspended human hepatocytes with various concentration of human serum albumin (HSA).

**Supplemental Figure 2.** The hepatic unbound uptake clearance in the presence of the albumin ( $PS_{u,inf}(+)$ ) of clinical OATPs substrates in suspended human hepatocytes.

**Supplemental Table 1.** LC–MS/MS conditions for eleven drugs

**Supplemental Table 2.** The reported values of  $K_m$  and the uptake clearance of eleven drugs in suspended hepatocytes

**Supplemental Table 3.** Sources of *in vitro* and *in vivo* parameters

(A) Cassette A

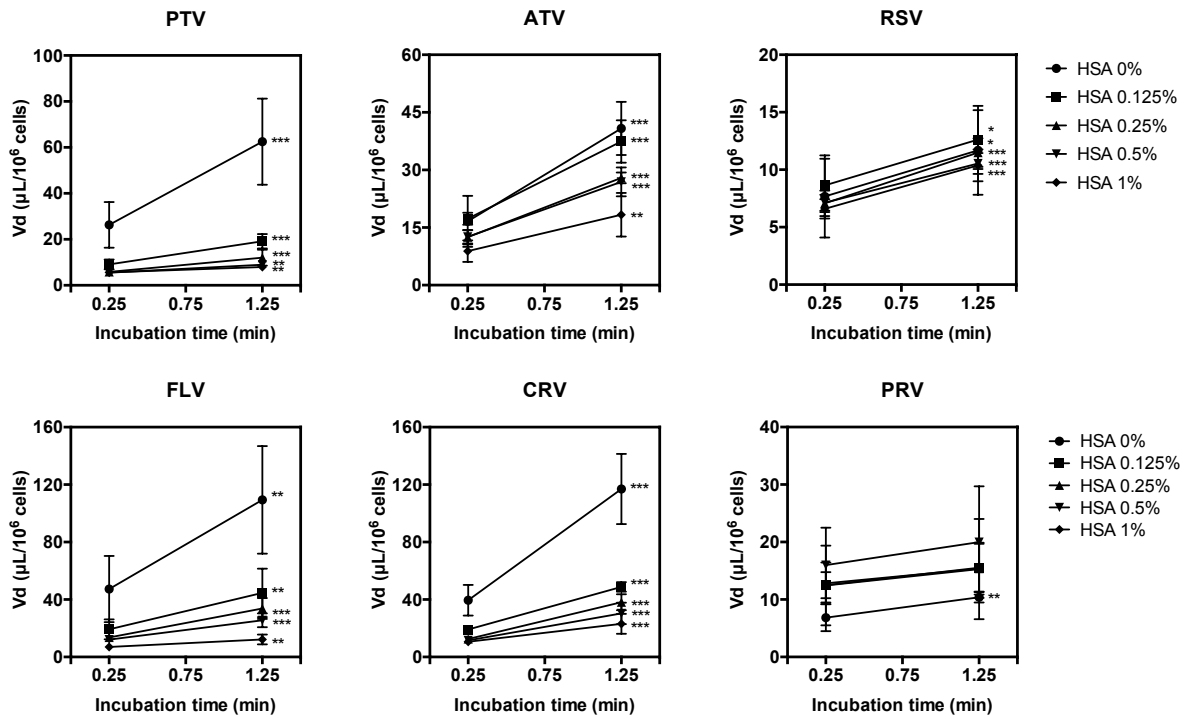

(B) Cassette B

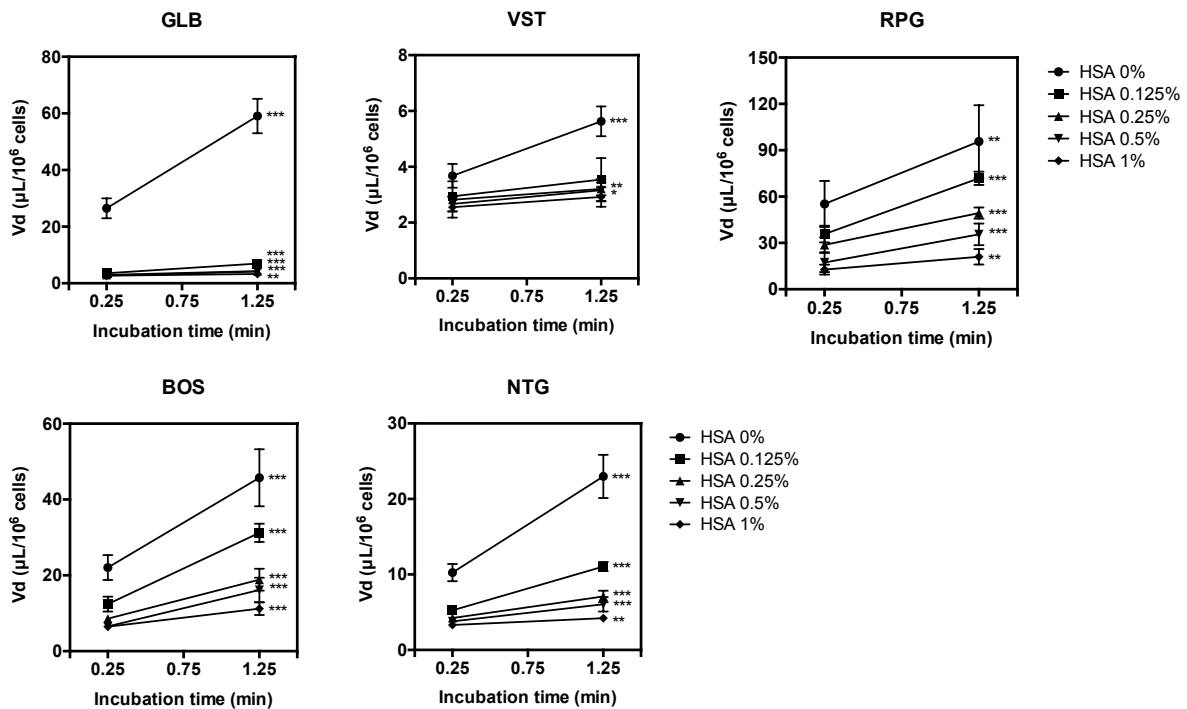

**Supplemental Figure 1.** Time profiles of the uptake of OATP substrates in suspended human hepatocytes with various concentration of human serum albumin (HSA) (mean  $\pm$  SD, n=8). Panel (A) and (B) is cassette A and B set, respectively. PTV, pitavastatin; ATV, atorvastatin; RSV, rosuvastatin; FLV, fluvastatin; CRV, cerivastatin; PRV, pravastatin; GLB, glibenclamide; VST, valsartan; RPG, repaglinide; BOS, bosentan; NTG, nateglinide. \* $P < 0.05$  vs @0.25 min, \*\* $P < 0.005$  vs @0.25 min, \*\*\* $P < 0.0005$  vs @0.25 min

(A) Cassette A

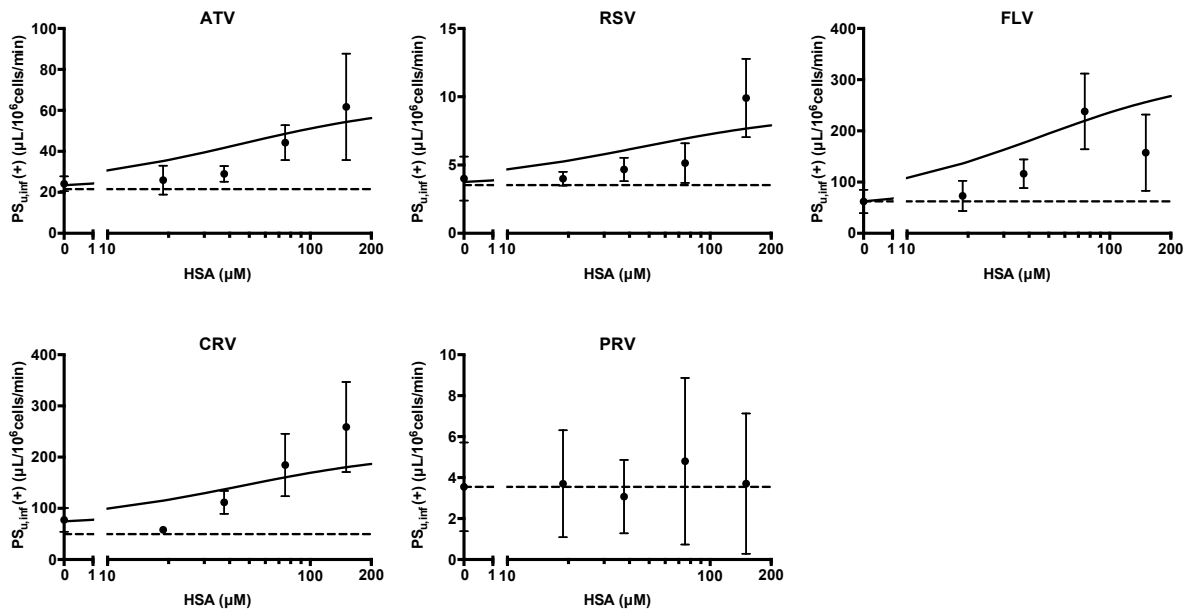

(B) Cassette B

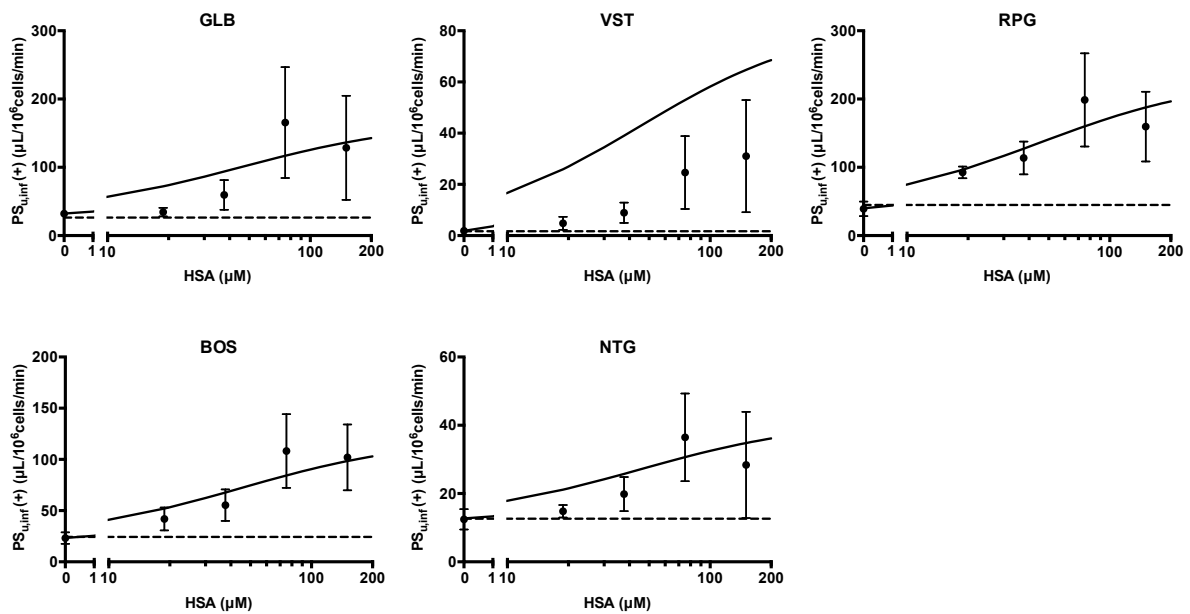

**Supplemental Figure 2.** The hepatic unbound uptake clearance in the presence of the albumin ( $PS_{u,inf}(+)$ ) of clinical OATPs substrates in suspended human hepatocytes. The filled circle, solid line and broken line represent the calculated  $PS_{u,inf}(+)$  (mean  $\pm$  SD,  $n=8$ ), the fitted line by Tsao's model (Eq. 8), and the theoretical line based on free drug theory, respectively. Panel (A) and (B) is cassette A and B set, respectively. PTV, pitavastatin; ATV, atorvastatin; RSV, rosuvastatin; FLV, fluvastatin; CRV, cerivastatin; PRV, pravastatin; GLB, glibenclamide; VST, valsartan; RPG, repaglinide; BOS, bosentan; NTG, nateglinide.

**Supplemental Table 1.** LC–MS/MS conditions for eleven drugs

| LC–MS/MS      | Shimadzu LCMS-8050 triple quadrupole mass spectrometer<br>(Shimadzu, Kyoto, Japan) |            |                                           |
|---------------|------------------------------------------------------------------------------------|------------|-------------------------------------------|
| Column        | Kintex C18 column (2.1 × 100 mm, 2.6 μm; Phenomenex, Torrance, CA)                 |            |                                           |
| Flow rate     | 0.3 mL/min                                                                         |            |                                           |
| Mobile phase  | A: 01% Formic acid, B: Acetonitrile                                                |            |                                           |
| Drugs         | ESI mode                                                                           | <i>m/z</i> | Gradient condition<br>(B concentration %) |
| Pitavastatin  | Positive                                                                           | 422/290    |                                           |
| Atorvastatin  | Positive                                                                           | 559/440    |                                           |
| Rosuvastatin  | Positive                                                                           | 482/258    | 0.5min, 5% → 3.5min, 80% →                |
| Fluvastatin   | Negative                                                                           | 410/215    | 4.5min, 80% → 4.6min, 5% → 6min, 5%       |
| Cerivastatin  | Positive                                                                           | 460/356    |                                           |
| Pravastatin   | Negative                                                                           | 423/303    |                                           |
| Glibenclamide | Positive                                                                           | 494/369    |                                           |
| Valsartan     | Positive                                                                           | 436/291    |                                           |
| Repaglinide   | Positive                                                                           | 453/230    | 0.5min, 5% → 5.5min, 80% →                |
| Bosentan      | Positive                                                                           | 553/202    | 6.5min, 80% → 6.6min, 5% → 8min, 5%       |
| Nateglinide   | Negative                                                                           | 317/113    |                                           |

**Supplemental Table 2.** The reported values of  $K_m$  and the uptake clearance of eleven drugs in suspended hepatocytes

| Drugs         | $K_m$<br>( $\mu M$ ) |              | Uptake clearance without HSA<br>( $\mu L/min/10^6$ cells, $PS_{u,inf}$ ) |              |           |
|---------------|----------------------|--------------|--------------------------------------------------------------------------|--------------|-----------|
|               | Values               | References   | Values                                                                   | References   | Our study |
| Pitavastatin  | 2.99, 1.59           | [1],[2]      | 26.7, 40.1                                                               | [1],[2]      | 36.2      |
| Atorvastatin  | 0.18                 | [3]          | 211                                                                      | [3]          | 24.2      |
| Rosuvastatin  | 10.3, 11, 4          | [2],[4],[5]  | 11.1, 4.1, 1.2                                                           | [2],[4],[5]  | 4.0       |
| Fluvastatin   | (4.8, 12)*           | [6],[7]      | -                                                                        |              | 62.1      |
| Cerivastatin  | 18.3                 | [8]          | 284                                                                      | [8]          | 77.5      |
| Pravastatin   | 2.25, 76.7, 11.5     | [2],[9],[10] | 2.8, 1.8, 0.9,                                                           | [2],[9],[10] | 3.6       |
| Glibenclamide | (1.24, 2.0)*         | [6],[11]     | -                                                                        |              | 32.2      |
| Valsartan     | 10.4                 | [2]          | 2.9                                                                      | [2]          | 1.9       |
| Repaglinide   | 12.8                 | [2]          | 52.3, 41.0                                                               | [2],[3]      | 39.2      |
| Bosentan      | 1.3, 22.5            | [2],[3]      | 36.1, 17.9                                                               | [2],[3]      | 23.2      |
| Nateglinide   | (36.4)*              | [6]          | -                                                                        |              | 12.5      |

\* OATP1B1 over-expressed HEK cells

- 1) Fujino H, Nakai D, Nakagomi R, Saito M, Tokui T, Kojima J (2004) Metabolic stability and uptake by human hepatocytes of pitavastatin, a new inhibitor of HMG-CoA reductase. *Arzneimittelforschung*, **54**: 382-8.
- 2) Ménochet K, Kenworthy KE, Houston JB, Galetin A (2012) Use of mechanistic modeling to assess interindividual variability and interspecies differences in active uptake in human and rat hepatocytes. *Drug Metab Dispos* **40**: 1744-56.
- 3) Yoshikado T, Maeda K, Furihata S, Terashima H, Nakayama T, Ishigame K, Tsunemoto K, Kusuhara H, Furihata KI, Sugiyama Y (2017) A Clinical Cassette Dosing Study for Evaluating the Contribution of Hepatic OATPs and CYP3A to Drug-Drug Interactions. *Pharm Res* **34**: 1570-1583.
- 4) Shen H, Yang Z, Mintier G, Han YH, Chen C, Balimane P, Jemal M, Zhao W, Zhang R, Kallipatti S, Selvam S, Sukrutharaj S, Krishnamurthy P, Marathe P, Rodrigues AD (2013) Cynomolgus Monkey as a Potential Model to Assess Drug Interactions Involving Hepatic Organic Anion Transporting Polypeptides: In Vitro, In Vivo, and In Vitro-to-In Vivo Extrapolation. *J Pharmacol Exp Ther* **344**: 673-85.
- 5) Uchida M, Tajima Y, Kakuni M, Kageyama Y, Okada T, Sakurada E, Tateno C, Hayashi R (2018) Organic Anion-Transporting Polypeptide (OATP)-Mediated Drug-Drug Interaction Study between Rosuvastatin and Cyclosporine A in Chimeric Mice with Humanized Liver. *Drug Metab Dispos* **46**: 11-19.
- 6) Izumi S, Nozaki Y, Maeda K, Komori T, Takenaka O, Kusuhara H, Sugiyama Y (2015) Investigation of the impact of substrate selection on in vitro organic anion transporting polypeptide 1B1 inhibition profiles for the prediction of drug-drug interactions. *Drug Metab Dispos* **43**: 235-47.
- 7) Sharma P, Butters CJ, Smith V, Elsby R, Surry D (2012) Prediction of the in vivo OATP1B1-mediated drug-drug interaction potential of an investigational drug against a range of statins. *Eur J Pharm Sci* **47**: 244-55.
- 8) Shitara Y, Itoh T, Sato H, Li AP, Sugiyama Y (2003) Inhibition of transporter-mediated hepatic uptake as a mechanism for drug-drug interaction between cerivastatin and cyclosporin A. *J Pharmacol Exp Ther* **304**: 610-6.
- 9) Mao J, Doshi U, Wright M, Hop CECA, Li AP, Chen Y (2018) Prediction of the Pharmacokinetics of Pravastatin as an OATP Substrate Using Plateable Human Hepatocytes With Human Plasma Data and PBPK Modeling. *CPT Pharmacometrics Syst Pharmacol* **7**: 251-258.

- 10) Nakai D, Nakagomi R, Furuta Y, Tokui T, Abe T, Ikeda T, Nishimura K (2001) Human liver-specific organic anion transporter, LST-1, mediates uptake of pravastatin by human hepatocytes. *J Pharmacol Exp Ther* **297**: 861-7.
- 11) Varma MV, Scialis RJ, Lin J, Bi YA, Rotter CJ, Goosen TC, Yang X (2014) Mechanism-based pharmacokinetic modeling to evaluate transporter-enzyme interplay in drug interactions and pharmacogenetics of glyburide. *AAPS J* **16**: 736-48.

**Supplemental Table 3.** Sources of *in vitro* and *in vivo* parameters

| Drugs         | $R_B$ | Clinical data after a single intravenous dose |            |            |            |            | References  |
|---------------|-------|-----------------------------------------------|------------|------------|------------|------------|-------------|
|               |       | $CL_{t,p}$                                    | $CL_{r,p}$ | $CL_{t,B}$ | $CL_{r,B}$ | $CL_{h,B}$ |             |
|               |       | (mL/min/kg)                                   |            |            |            |            |             |
| Pitavastatin  | 0.58  | 5.63                                          | 0.04       | 9.71       | 0.0679     | 9.64       | [1],[2]     |
| Atorvastatin  | 0.66  | 8.93                                          | Negligible | 13.5       | Negligible | 13.5       | [1],[2],[3] |
| Rosuvastatin  | 0.69  | 11.60                                         | 3.24       | 16.8       | 4.70       | 12.1       | [4],[5]     |
| Fluvastatin   | 0.62  | 8.70                                          | Negligible | 14.0       | Negligible | 14.0       | [6],[7]     |
| Cerivastatin  | 0.58  | 2.90                                          | Negligible | 5.00       | Negligible | 5.00       | [8],[9]     |
| Pravastatin   | 0.56  | 13.50                                         | 6.30       | 24.1       | 11.3       | 12.9       | [1],[10]    |
| Glibenclamide | 0.46  | 1.06                                          | Negligible | 2.30       | Negligible | 2.30       | [11],[12]   |
| Valsartan     | 0.55  | 0.52                                          | 0.15       | 0.947      | 0.269      | 0.678      | [13],[14]   |
| Repaglinide   | 0.62  | 7.80                                          | 0.62       | 12.6       | 1.00       | 11.6       | [15],[16]   |
| Bosentan      | 0.83  | 2.39                                          | 0.02       | 2.88       | 0.0259     | 2.85       | [2],[17]    |
| Nateglinide   | 0.5   | 1.53                                          | Negligible | 3.05       | Negligible | 3.05       | [18]        |

$R_B$ , the blood partitioning;  $CL_{t,p}$  total plasma clearance;  $CL_{r,p}$ , renal plasma clearance;  $CL_{t,B}$ , total blood clearance ( $CL_{t,p}/R_B$ );  $CL_{r,B}$ , renal blood clearance ( $CL_{r,p}/R_B$ );  $CL_{h,B}$ , hepatic blood clearance ( $CL_{t,B} - CL_{r,B}$ ).

- 1) Watanabe T, Kusuvara H, Maeda K, Kanamaru H, Saito Y, Hu Z, and Sugiyama Y (2010) Investigation of the rate-determining process in the hepatic elimination of HMG-CoA reductase inhibitors in rats and humans. *Drug Metab Dispos* **38**: 215-222.
- 2) FDA approval package or manufacturer's information
- 3) Gibson, D.M., Stern, R.H., Abel, R.B., and Whitfield, L.R (1997) Absolute bioavailability of atorvastatin in man. *Pharm Res* **14**: S253 (Abstract 2107).
- 4) Martin PD, Warwick MJ, Dane AL, Brindley C, Short T (2003) Absolute oral bioavailability of rosuvastatin in healthy white adult male volunteers. *Clin Ther* **25**: 2553-2563.
- 5) Martin PD, Warwick MJ, Dane AL, Hill SJ, Giles PB, Phillips PJ, and Lenz E (2003) Metabolism, excretion, and pharmacokinetics of rosuvastatin in healthy adult male volunteers. *Clin Ther* **25**: 2822-2835.
- 6) Tse FL, Nickerson DF, Yardley WS (1993) Binding of fluvastatin to blood cells and plasma proteins. *J Pharm Sci* **82**(9): 942-947.
- 7) Lindahl A, Sandstrom R, Ungell AL, Abrahamsson B, Knutson TW, Knutson L, and Lennernas H (1996) Jejunal Permeability and hepatic extraction of fluvastatin in humans. *Clin Pharmacol Ther* **60**: 493-503.
- 8) Mück W, Ritter W, Ochmann K, Unger S, Ahr G, Wingender W, Kuhlmann J (1997) Absolute and relative bioavailability of the HMG-CoA reductase inhibitor cerivastatin. *Int J Clin Pharmacol Ther* **35**: 255-60.
- 9) Mück W (2000) Clinical pharmacokinetics of cerivastatin. *Clin Pharmacokinet* **39**: 99-116.
- 10) Singhvi SM, Pan HY, Morrison RA, and Willard DA (1990) Disposition of pravastatin sodium, a tissue-selective HMG-CoA reductase inhibitor, in healthy subjects. *Br J Clin Pharmacol* **29**: 239-243.
- 11) Rupp W, Christo O, Fulberth W (1972) Studies on the bioavailability of glibenclamide. *Arzneimittelforschung* **22**: 471-473.
- 12) Rydberg T, Jönsson A, Melander A (1995) Comparison of the kinetics of glyburide and its active metabolites in humans. *J Clin Pharm Ther* **20**: 283-95.
- 13) Watanabe T, Debori Y, Maeda K, Kondo T, Nakayama H, Horita S, Ogilvie BW, Parkinson A, Hu Z, Sugiyama Y (2011) Prediction of the overall renal tubular secretion and hepatic clearance of anionic drugs and a renal drug-drug interaction involving organic anion transporter 3 in humans by *in vitro* uptake experiments. *Drug Metab Dispos* **39**: 1031-8.

- 14) Flesch G, Muller P, and Lloyd P (1997) Absolute bioavailability and pharmacokinetics of valsartan, an angiotensin II receptor antagonist, in man. *Eur J Clin Pharmacol* **52**: 115-120.
- 15) van Heiningen PN, Hatorp V, Kramer Nielsen K, Hansen KT, van Lier JJ, De Merbel NC, Oosterhuis B, Jonkman JH (1999) Absorption, metabolism and excretion of a single oral dose of (14)C-repaglinide during repaglinide multiple dosing. *Eur J Clin Pharmacol* **55**: 521-525.
- 16) Hatorp V, Oliver S, and Su CA (1998) Bioavailability of repaglinide, a novel antidiabetic agent, administered orally in tablet or solution form or intravenously in healthy male volunteers. *Int J Clin Pharmacol Ther* **36**: 636-641.
- 17) Weber C, Gasser R, and Hopfgartner G (1999) Absorption, excretion, and metabolism of the endothelin receptor antagonist bosentan in healthy male subjects. *Drug Metab Dispos* **27**: 810-815.
- 18) Weaver ML, Orwig BA, Rodriguez LC, Graham ED, Chin JA, Sharpiro MJ, Mcleod JF, Mangold JB (2001) Pharmacokinetics and metabolism of nateglinide in humans. *Drug Metab Dispos* **29**: 415-421.
